# Supplementary material
Source: PubMed Central journal article supplement (PMC3683837)

**Supplementary Figure 1.** Digital image analysis shows increased co-localization of HLA-DR and CD11c in gastric mucosa of an *H. pylori*-infected subject. (a) Representative tissue sections from a non-infected (top panels) and an *H. pylori*-infected subject (bottom panels) with CD11c<sup>+</sup> cells labeled red and HLA-DR<sup>+</sup> cells labeled green. (b) For digital image analysis, regions of interest (delineated by yellow lines) were set to exclude epithelial cells. (c) Intensity scatter plot depicted overlap (yellow) of red and green pixels.

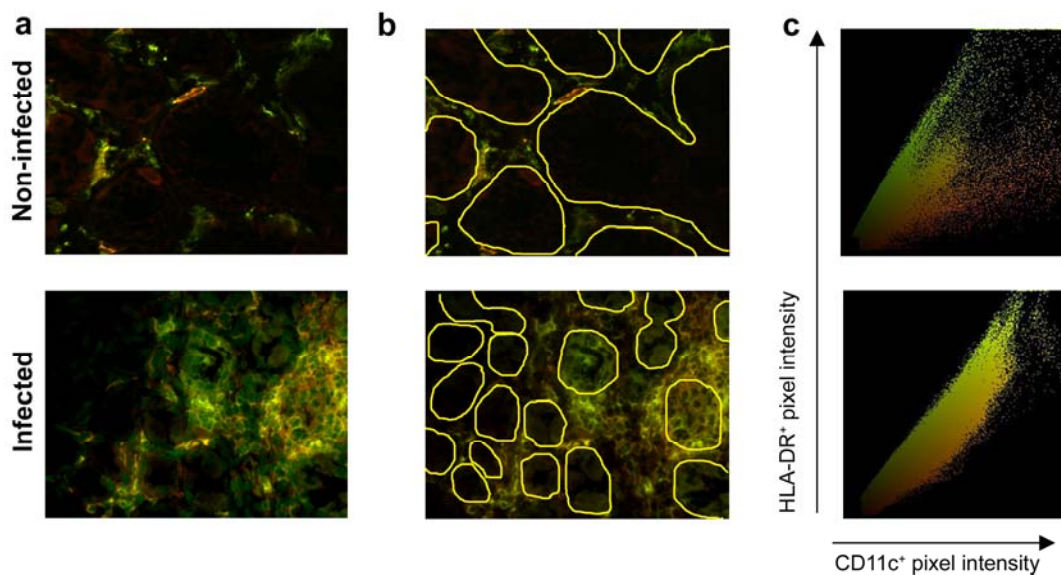

Supplement: NIHMS472628-supplement-01.pdf [file NIHMS472628-supplement-01.pdf]
